# Supplementary material
Source: PubMed Central journal article supplement (PMC3754284)
Supplement: AAC.00629-13_zac999102088so1.pdf [file AAC.00629-13_zac999102088so1.pdf]

| Supplemental Table S1. MB-1 MIC values for various $\beta$ -lactamase-expressing strains of <i>E. coli</i> DH5 $\alpha$ in pUCP26. <sup>1</sup> – Historical data described previously (8). |              |       |                                |                        |                        |                       |                         |                                                        |                          |                                                         |
|---------------------------------------------------------------------------------------------------------------------------------------------------------------------------------------------|--------------|-------|--------------------------------|------------------------|------------------------|-----------------------|-------------------------|--------------------------------------------------------|--------------------------|---------------------------------------------------------|
|                                                                                                                                                                                             |              | MB-1  | MB-1 + 4 $\mu$ g/ml Tazobactam | Aztreonam <sup>1</sup> | Meropenem <sup>1</sup> | Cefepime <sup>1</sup> | Cefotaxime <sup>1</sup> | Cefotaxime + 4 $\mu$ g/ml Clavulanic Acid <sup>1</sup> | Ceftazidime <sup>1</sup> | Ceftazidime + 4 $\mu$ g/ml Clavulanic Acid <sup>1</sup> |
| Parent strain                                                                                                                                                                               | DH5 $\alpha$ | 0.06  | 0.06                           | 0.125                  | 0.015                  | 0.03                  | 0.125                   | 0.03                                                   | 0.5                      | 0.125                                                   |
| Empty Vector                                                                                                                                                                                | pUCP26       | 0.06  | 0.06                           | 0.06                   | 0.015                  | 0.03                  | 0.06                    | 0.03                                                   | 0.25                     | 0.125                                                   |
| <b>CLASS A</b>                                                                                                                                                                              | CTX-M 1      | 0.125 | 0.06                           | 32                     | 0.25                   | 8                     | >64                     | 0.06                                                   | 2                        | 0.125                                                   |
|                                                                                                                                                                                             | CTX-M 2      | 0.06  | 0.06                           | 8                      | 0.25                   | 1                     | >64                     | 0.06                                                   | 1                        | 0.125                                                   |
|                                                                                                                                                                                             | CTX-M 3      | 0.06  | 0.06                           | 64                     | 0.25                   | 8                     | >64                     | 0.06                                                   | 2                        | 0.25                                                    |
|                                                                                                                                                                                             | CTX-M 9      | 0.06  | 0.03                           | 16                     | 0.25                   | 2                     | 32                      | 0.06                                                   | 1                        | 0.125                                                   |
|                                                                                                                                                                                             | CTX-M 15     | 0.125 | 0.06                           | >64                    | 0.25                   | 8                     | >64                     | 0.03                                                   | 32                       | 0.125                                                   |
|                                                                                                                                                                                             | GES 1        | 0.125 | 0.06                           | 0.5                    | 0.25                   | 0.125                 | 2                       | 0.06                                                   | 16                       | 0.25                                                    |
|                                                                                                                                                                                             | GES 2        | 0.06  | 0.06                           | 0.5                    | 0.25                   | 0.5                   | 4                       | 2                                                      | 16                       | 16                                                      |
|                                                                                                                                                                                             | GES 8        | 0.06  | 0.06                           | 0.25                   | 0.125                  | 0.03                  | 0.25                    | 0.03                                                   | 1                        | 0.125                                                   |
|                                                                                                                                                                                             | KPC 2        | 0.03  | 0.03                           | 2                      | 0.06                   | 0.25                  | 0.25                    | 0.03                                                   | 0.5                      | 0.125                                                   |
|                                                                                                                                                                                             | KPC 3        | 0.06  | 0.06                           | 4                      | 0.5                    | 0.125                 | 1                       | 0.03                                                   | 0.5                      | 0.125                                                   |
|                                                                                                                                                                                             | KPC 4        | 0.06  | 0.06                           | 32                     | 0.015                  | 0.125                 | 0.5                     | 0.03                                                   | 8                        | 0.125                                                   |
|                                                                                                                                                                                             | KPC 7        | 0.06  | 0.03                           | 4                      | 0.06                   | 0.25                  | 0.5                     | 0.03                                                   | 2                        | 0.125                                                   |
|                                                                                                                                                                                             | KPC 8        | 0.03  | 0.06                           | 8                      | 0.125                  | 0.25                  | 0.5                     | 0.03                                                   | 4                        | 0.25                                                    |
|                                                                                                                                                                                             | SHV 1        | 0.06  | 0.06                           | 0.25                   | 0.015                  | 0.125                 | 0.06                    | 0.03                                                   | 1                        | 0.125                                                   |
|                                                                                                                                                                                             | SHV 2        | 0.06  | 0.06                           | 8                      | 0.015                  | 2                     | 8                       | 0.03                                                   | 4                        | 0.125                                                   |
|                                                                                                                                                                                             | SHV 2A       | 0.25  | 0.25                           | 8                      | 0.03                   | 2                     | 16                      | 0.06                                                   | 4                        | 0.25                                                    |
|                                                                                                                                                                                             | SHV 4        | 0.25  | 0.125                          | >64                    | 0.015                  | 1                     | 8                       | 0.03                                                   | >64                      | 0.125                                                   |
|                                                                                                                                                                                             | SHV 5        | 0.125 | 0.06                           | >64                    | 0.03                   | 2                     | 16                      | 0.03                                                   | >64                      | 0.25                                                    |
|                                                                                                                                                                                             | SHV 6        | 0.125 | 0.125                          | 0.125                  | 0.015                  | 0.25                  | 0.125                   | 0.06                                                   | 2                        | 0.25                                                    |
|                                                                                                                                                                                             | SHV 8        | 0.125 | 0.06                           | 0.5                    | 0.015                  | 0.25                  | 0.125                   | 0.06                                                   | 8                        | 0.25                                                    |
|                                                                                                                                                                                             | SHV 10       | 0.125 | 0.125                          | 8                      | 0.03                   | 1                     | 8                       | 0.06                                                   | 8                        | 0.25                                                    |
|                                                                                                                                                                                             | SHV 11       | 0.06  | 0.06                           | 0.5                    | 0.03                   | 0.125                 | 0.03                    | 0.03                                                   | 1                        | 0.25                                                    |
|                                                                                                                                                                                             | SHV 12       | 0.06  | 0.06                           | >64                    | 0.03                   | 0.5                   | 4                       | 0.125                                                  | 64                       | 0.25                                                    |
|                                                                                                                                                                                             | SHV 14       | 0.125 | 0.125                          | 0.25                   | 0.03                   | 0.125                 | 0.06                    | 0.06                                                   | 0.5                      | 0.25                                                    |
|                                                                                                                                                                                             | SHV 18       | 0.125 | 0.06                           | >64                    | 0.015                  | 0.5                   | 8                       | 0.06                                                   | 64                       | 0.125                                                   |
|                                                                                                                                                                                             | SHV 19       | 0.125 | 0.125                          | 0.5                    | 0.03                   | 0.5                   | 0.125                   | 0.125                                                  | 1                        | 0.25                                                    |
|                                                                                                                                                                                             | SHV 20       | 0.125 | 0.125                          | 2                      | 0.015                  | 0.5                   | 4                       | 0.03                                                   | 2                        | 0.125                                                   |
|                                                                                                                                                                                             | SHV 22       | 0.125 | 0.125                          | >64                    | 0.015                  | 1                     | 8                       | 0.03                                                   | >64                      | 0.125                                                   |
|                                                                                                                                                                                             | SHV 24       | 0.125 | 0.125                          | 0.25                   | 0.015                  | 0.125                 | 0.125                   | 0.03                                                   | 4                        | 0.25                                                    |
|                                                                                                                                                                                             | SHV 26       | 0.125 | 0.125                          | 0.25                   | 0.03                   | 0.06                  | 0.06                    | 0.03                                                   | 0.25                     | 0.25                                                    |
|                                                                                                                                                                                             | SHV 27       | 0.125 | 0.125                          | 0.5                    | 0.015                  | 0.125                 | 0.125                   | 0.03                                                   | 1                        | 0.25                                                    |
|                                                                                                                                                                                             | SHV 30       | 0.125 | 0.125                          | 4                      | 0.015                  | 1                     | 4                       | 0.03                                                   | 2                        | 0.25                                                    |
|                                                                                                                                                                                             | SHV 31       | 0.25  | 0.25                           | 1                      | 0.015                  | 0.125                 | 0.06                    | 0.03                                                   | 1                        | 0.25                                                    |
|                                                                                                                                                                                             | SHV 33       | 0.125 | 0.125                          | 0.125                  | 0.015                  | 0.03                  | 0.06                    | 0.06                                                   | 0.25                     | 0.25                                                    |
|                                                                                                                                                                                             | SHV 38       | 0.125 | 0.125                          | 0.25                   | 0.015                  | 0.125                 | 0.03                    | 0.03                                                   | 0.5                      | 0.125                                                   |
|                                                                                                                                                                                             | SHV 40       | 0.125 | 0.125                          | 0.5                    | 0.015                  | 0.25                  | 0.06                    | 0.03                                                   | 1                        | 0.25                                                    |
|                                                                                                                                                                                             | SHV 41       | 0.25  | 0.25                           | 0.25                   | 0.015                  | 0.125                 | 0.06                    | 0.03                                                   | 0.5                      | 0.25                                                    |
|                                                                                                                                                                                             | SHV 48       | 0.06  | 0.06                           | 0.5                    | 0.015                  | 0.125                 | 0.06                    | 0.03                                                   | 1                        | 0.125                                                   |
|                                                                                                                                                                                             | SHV 49       | 0.25  | 0.25                           | 0.125                  | 0.015                  | 0.06                  | 0.06                    | 0.06                                                   | 0.5                      | 0.25                                                    |
|                                                                                                                                                                                             | SHV 53       | 0.06  | 0.06                           | 0.5                    | 0.015                  | 0.125                 | 0.06                    | 0.06                                                   | 1                        | 0.25                                                    |
|                                                                                                                                                                                             | SHV 57       | 0.25  | 0.125                          | 0.5                    | 0.015                  | 0.25                  | 0.06                    | 0.03                                                   | 16                       | 0.125                                                   |
|                                                                                                                                                                                             | SHV 60       | 0.125 | 0.125                          | 0.25                   | 0.015                  | 0.06                  | 0.06                    | 0.03                                                   | 2                        | 0.125                                                   |
|                                                                                                                                                                                             | SHV 65       | 0.125 | 0.06                           | 0.25                   | 0.015                  | 0.125                 | 0.06                    | 0.03                                                   | 0.5                      | 0.125                                                   |
|                                                                                                                                                                                             | SHV 70       | 0.125 | 0.25                           | 0.25                   | 0.015                  | 0.125                 | 0.06                    | 0.03                                                   | 0.5                      | 0.125                                                   |
|                                                                                                                                                                                             | SHV 75       | 0.06  | 0.06                           | 0.5                    | 0.015                  | 0.125                 | 0.03                    | 0.03                                                   | 1                        | 0.25                                                    |
|                                                                                                                                                                                             | SHV 78       | 0.25  | 0.25                           | 0.125                  | 0.03                   | 0.03                  | 0.125                   | 0.06                                                   | 0.25                     | 0.25                                                    |
|                                                                                                                                                                                             | SHV 96       | 0.125 | 0.06                           | 0.125                  | 0.015                  | 0.03                  | 0.03                    | 0.03                                                   | 0.25                     | 0.25                                                    |
|                                                                                                                                                                                             | SHV 102      | 0.125 | 0.125                          | 2                      | 0.015                  | 0.5                   | 2                       | 0.03                                                   | 2                        | 0.125                                                   |
|                                                                                                                                                                                             | SHV 103      | 0.125 | 0.125                          | 0.125                  | 0.03                   | 0.03                  | 0.06                    | 0.03                                                   | 0.25                     | 0.25                                                    |
|                                                                                                                                                                                             | SHV 111      | 0.125 | 0.125                          | 0.5                    | 0.015                  | 0.25                  | 0.06                    | 0.03                                                   | 2                        | 0.25                                                    |
|                                                                                                                                                                                             | SHV 113      | 0.25  | 0.25                           | 0.25                   | 0.015                  | 0.125                 | 0.125                   | 0.03                                                   | 4                        | 0.25                                                    |
|                                                                                                                                                                                             | SHV 116      | 0.125 | 0.06                           | 0.25                   | 0.015                  | 0.125                 | 0.06                    | 0.06                                                   | 0.5                      | 0.25                                                    |
|                                                                                                                                                                                             | TEM 1        | 0.06  | 0.03                           | 0.25                   | 0.03                   | 0.125                 | 0.03                    | 0.015                                                  | 0.25                     | 0.125                                                   |
|                                                                                                                                                                                             | TEM 2        | 0.03  | 0.03                           | 0.125                  | 0.015                  | 0.125                 | 0.06                    | 0.03                                                   | 0.25                     | 0.125                                                   |
|                                                                                                                                                                                             | TEM 3        | 0.06  | 0.03                           | 0.06                   | 0.015                  | 0.06                  | 0.03                    | 0.015                                                  | 1                        | 0.125                                                   |
|                                                                                                                                                                                             | TEM 4        | 0.03  | 0.03                           | 8                      | 0.015                  | 0.25                  | 4                       | 0.03                                                   | 4                        | 0.125                                                   |
|                                                                                                                                                                                             | TEM 6        | 0.06  | 0.03                           | 16                     | 0.015                  | 0.25                  | 0.25                    | 0.015                                                  | 32                       | 0.25                                                    |
|                                                                                                                                                                                             | TEM 7        | 0.06  | 0.06                           | 2                      | 0.03                   | 1                     | 0.25                    | 0.06                                                   | 8                        | 0.125                                                   |

|         |           |       |       |       |       |       |       |       |       |       |
|---------|-----------|-------|-------|-------|-------|-------|-------|-------|-------|-------|
|         | TEM 10    | 0.06  | 0.03  | 64    | 0.015 | 1     | 0.5   | 0.03  | 64    | 0.125 |
|         | TEM 12    | 0.06  | 0.06  | 0.25  | 0.015 | 0.25  | 0.06  | 0.03  | 4     | 0.25  |
|         | TEM 15    | 0.06  | 0.03  | 4     | 0.015 | 0.25  | 2     | 0.03  | 4     | 0.125 |
|         | TEM 16    | 0.06  | 0.03  | 64    | 0.03  | 2     | 1     | 0.03  | 64    | 0.25  |
|         | TEM 24    | 0.25  | 0.06  | 64    | 0.015 | 1     | 2     | 0.03  | >64   | 0.5   |
|         | TEM 29    | 0.03  | 0.03  | 0.25  | 0.015 | 0.25  | 0.06  | 0.03  | 4     | 0.125 |
|         | TEM 30    | 0.06  | 0.03  | 0.125 | 0.015 | 0.06  | 0.06  | 0.03  | 0.125 | 0.125 |
|         | TEM 31    | 0.06  | 0.06  | 0.125 | 0.015 | 0.03  | 0.06  | 0.06  | 0.125 | 0.125 |
|         | TEM 32    | 0.03  | 0.03  | 0.125 | 0.03  | 0.06  | 0.03  | 0.03  | 0.125 | 0.125 |
|         | TEM 33    | 0.06  | 0.06  | 0.06  | 0.03  | 0.06  | 0.015 | 0.015 | 0.125 | 0.125 |
|         | TEM 34    | 0.03  | 0.03  | 0.06  | 0.03  | 0.03  | 0.03  | 0.015 | 0.06  | 0.06  |
|         | TEM 35    | 0.03  | 0.03  | 0.125 | 0.015 | 0.06  | 0.03  | 0.03  | 0.125 | 0.125 |
|         | TEM 36    | 0.03  | 0.03  | 0.06  | 0.03  | 0.03  | 0.015 | 0.015 | 0.06  | 0.125 |
|         | TEM 38    | 0.03  | 0.015 | 0.03  | 0.015 | 0.03  | 0.03  | 0.015 | 0.125 | 0.06  |
|         | TEM 39    | 0.03  | 0.03  | 0.06  | 0.015 | 0.03  | 0.03  | 0.03  | 0.125 | 0.125 |
|         | TEM 44    | 0.03  | 0.03  | 0.06  | 0.03  | 0.015 | 0.015 | 0.015 | 0.125 | 0.06  |
|         | TEM 45    | 0.03  | 0.03  | 0.06  | 0.015 | 0.06  | 0.03  | 0.03  | 0.125 | 0.125 |
|         | TEM 47    | 0.03  | 0.03  | 32    | 0.015 | 0.25  | 2     | 0.03  | 8     | 0.125 |
|         | TEM 51    | 0.06  | 0.06  | 0.06  | 0.03  | 0.06  | 0.03  | 0.03  | 0.125 | 0.125 |
|         | TEM 53    | 0.06  | 0.03  | 1     | 0.015 | 1     | 0.125 | 0.06  | 8     | 0.125 |
|         | TEM 58    | 0.03  | 0.03  | 0.125 | 0.03  | 0.03  | 0.03  | 0.03  | 0.125 | 0.125 |
|         | TEM 73    | 0.06  | 0.03  | 0.06  | 0.015 | 0.03  | 0.03  | 0.03  | 0.125 | 0.125 |
|         | TEM 74    | 0.06  | 0.06  | 0.125 | 0.015 | 0.06  | 0.03  | 0.03  | 0.125 | 0.125 |
|         | TEM 76    | 0.03  | 0.03  | 0.06  | 0.03  | 0.015 | 0.03  | 0.03  | 0.125 | 0.125 |
|         | TEM 81    | 0.03  | 0.03  | 0.06  | 0.015 | 0.015 | 0.03  | 0.015 | 0.125 | 0.125 |
|         | TEM 89    | 0.06  | 0.06  | 0.06  | 0.015 | 0.03  | 0.03  | 0.015 | 0.125 | 0.125 |
|         | TEM 103   | 0.125 | 0.125 | 0.125 | 0.015 | 0.125 | 0.06  | 0.06  | 0.25  | 0.25  |
|         | TEM 109   | 0.06  | 0.03  | 16    | 0.015 | 0.25  | 0.25  | 0.03  | 32    | 0.25  |
|         | TEM 115   | 0.03  | 0.06  | 0.5   | 0.015 | 0.125 | 0.06  | 0.03  | 2     | 0.125 |
|         | TEM 121   | 0.125 | 0.03  | 64    | 0.03  | 0.015 | 2     | 0.06  | >64   | 0.5   |
|         | TEM 143   | 0.03  | 0.03  | 0.125 | 0.015 | 0.03  | 0.03  | 0.03  | 0.5   | 0.125 |
|         | TEM 152   | 0.06  | 0.03  | 2     | 0.03  | 0.25  | 0.06  | 0.03  | 32    | 0.5   |
|         | VEB 1     | 0.06  | 0.06  | 32    | 0.25  | 0.5   | 4     | 0.03  | >64   | 0.125 |
|         | VEB 3     | 0.5   | 0.5   | 2     | 0.125 | 0.015 | 0.125 | 0.03  | 0.5   | 0.03  |
|         | VEB 4     | 0.125 | 0.06  | 16    | 0.125 | 0.5   | 16    | 0.03  | >64   | 0.125 |
|         | VEB 7     | 0.5   | 0.5   | 32    | 0.125 | 0.5   | 4     | 0.06  | >64   | 0.25  |
| CLASS B | IMP 1     | 0.125 | 0.125 | 0.25  | 2     | 1     | 32    | 16    | 32    | 32    |
|         | IMP 2     | 0.06  | 0.03  | 0.125 | 0.5   | 2     | 8     | 4     | 64    | 64    |
|         | IMP 7     | 0.125 | 0.06  | 0.5   | 0.5   | 2     | 16    | 8     | 64    | 64    |
|         | NDM 1     | 0.06  | 0.03  | 0.125 | 16    | 4     | 64    | 64    | >64   | >64   |
|         | VIM 1     | 0.06  | 0.03  | 0.06  | 4     | 4     | 16    | 16    | >64   | 64    |
|         | VIM 2     | 0.03  | 0.015 | 0.06  | 4     | 0.06  | 64    | 32    | 2     | 2     |
|         | VIM 7     | 0.125 | 0.06  | 0.125 | 4     | 0.06  | 8     | 8     | 1     | 0.5   |
| CLASS C | ACC 1     | 0.125 | 0.06  | 1     | 0.25  | 0.25  | 4     | 2     | 16    | 8     |
|         | ACT 1     | 0.06  | 0.03  | 4     | 0.25  | 0.06  | 4     | 2     | 8     | 2     |
|         | CFE 1     | 0.125 | 0.06  | 2     | 0.25  | 0.06  | 8     | 2     | 8     | 2     |
|         | CMY 2     | 0.125 | 0.06  | 2     | 0.25  | 0.06  | 4     | 2     | 4     | 2     |
|         | CMY 19    | 2     | 1     | 2     | 0.125 | 0.03  | 0.125 | 0.008 | 0.5   | 0.03  |
|         | CMY 37    | 0.125 | 0.06  | 4     | 0.25  | 0.06  | 4     | 2     | 8     | 4     |
|         | DHA 1     | 0.03  | 0.03  | 0.06  | 0.25  | 0.03  | 0.06  | 0.03  | 0.125 | 0.06  |
|         | FOX 4     | 0.25  | 0.25  | 4     | 0.5   | 0.125 | 4     | 4     | >64   | 64    |
|         | LAT 1     | 0.06  | 0.06  | 1     | 0.25  | 0.03  | 0.5   | 0.25  | 0.5   | 0.5   |
|         | MIR 1     | 0.125 | 0.06  | 8     | 0.25  | 0.06  | 8     | 4     | 8     | 2     |
| Class D | OXA 1-30  | 0.125 | 0.125 | 0.125 | 0.015 | 0.125 | 0.06  | 0.03  | 0.25  | 0.125 |
|         | OXA 2     | 0.125 | 0.125 | 0.125 | 0.015 | 0.03  | 0.06  | 0.03  | 0.25  | 0.25  |
|         | OXA 4-35  | 0.06  | 0.06  | 0.125 | 0.03  | 0.06  | 0.125 | 0.06  | 0.25  | 0.25  |
|         | OXA 10    | 0.125 | 0.125 | 1     | 0.015 | 0.125 | 0.25  | 0.03  | 0.5   | 0.25  |
|         | OXA 18    | 0.125 | 0.125 | >64   | 0.03  | 4     | 32    | 0.06  | 32    | 0.25  |
|         | OXA 20    | 0.125 | 0.125 | 0.125 | 0.015 | 0.03  | 0.06  | 0.06  | 0.25  | 0.25  |
|         | OXA 23    | 0.25  | 0.25  | 0.125 | 0.03  | 0.06  | 0.06  | 0.03  | 0.25  | 0.25  |
|         | OXA 24-40 | 0.125 | 0.125 | 0.25  | 0.03  | 0.06  | 0.06  | 0.06  | 0.25  | 0.25  |
|         | OXA 48    | 0.125 | 0.125 | 0.125 | 0.03  | 0.06  | 0.06  | 0.03  | 0.25  | 0.125 |
|         | OXA 51    | 0.125 | 0.125 | 0.125 | 0.015 | 0.03  | 0.06  | 0.06  | 0.25  | 0.25  |
|         | OXA 58    | 0.06  | 0.06  | 0.125 | 0.03  | 0.03  | 0.03  | 0.03  | 0.25  | 0.125 |
|         | OXA 66    | 4     | 0.25  | 0.125 | 0.015 | 0.06  | 0.06  | 0.06  | 0.25  | 0.25  |

Supplemental Figure S2.

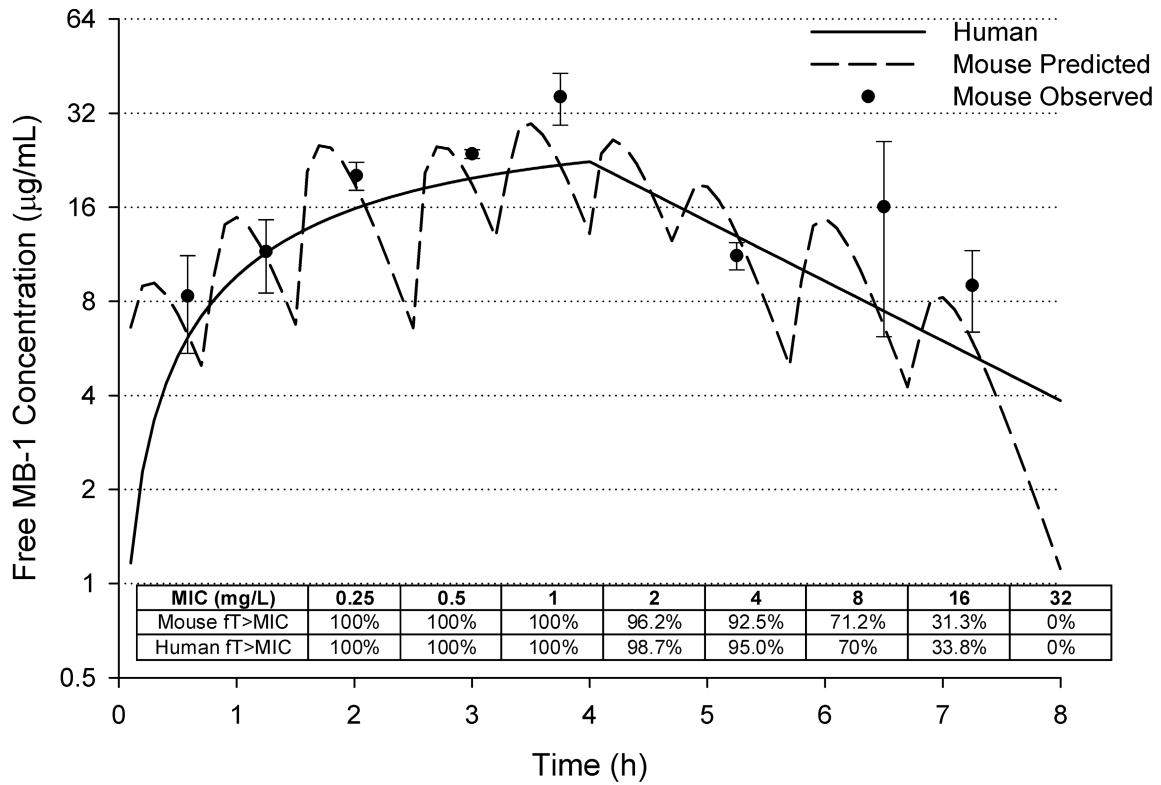

Figure S2. Free drug concentration over time profile of MB-1 dosed as anticipated clinically in humans (1 g infused over 4 hours 3X/day) and the corresponding human simulated profile in mice. Circles represent mean  $\pm$  standard deviation.

Supplemental Table S3. Antibiotic susceptibility profiles of *P. aeruginosa* clinical isolates evaluated in the neutropenic (I-) and immunocompetent (I+) thigh infection models.

| <i>P. aeruginosa</i> | <i>Model</i> | <i>MIC (μg/ml)</i> |            |            |            |            |            |
|----------------------|--------------|--------------------|------------|------------|------------|------------|------------|
|                      |              | <i>MB-1</i>        | <i>CAZ</i> | <i>CIP</i> | <i>MER</i> | <i>TOB</i> | <i>TZP</i> |
| UC12120              | I-, I+       | 0.25               | ND         | ND         | ND         | ND         | ND         |
| PA-3581              | I-           | 0.25               | ND         | ND         | ND         | ND         | ND         |
| PA01                 | I-           | 0.5                | ND         | ND         | ND         | ND         | ND         |
| JJ 8-16              | I-, I+       | 0.5                | 64         | 0.5        | 2          | 0.25       | 256        |
| JJ 5-35              | I-, I+       | 0.5                | 32         | 1          | 32         | 2          | 32         |
| AZ 8-18              | I-           | 1                  | 8          | 16         | 16         | 64         | 16         |
| AZ 32-13             | I-, I+       | 1                  | 16         | 8          | 2          | 1          | 32         |
| JJ 4-36              | I-, I+       | 1                  | 64         | 8          | 32         | 0.5        | 128        |
| JJ 11-54             | I-           | 2                  | 128        | 4          | 8          | 0.5        | 512        |

ND-No Data; CAZ-ceftazidime; CIP-ciprofloxacin; MER-meropenem; TOB-tobramycin; TZP-piperacillin/tazobactam
